# Supplementary material for: Strategies for Individual Phenotyping of Linoleic and Arachidonic Acid Metabolism Using an Oral Glucose Tolerance Test
Source: PubMed Central journal article supplement (PMC4364740; doi:10.1371/journal.pone.0119856), 2015-03-18

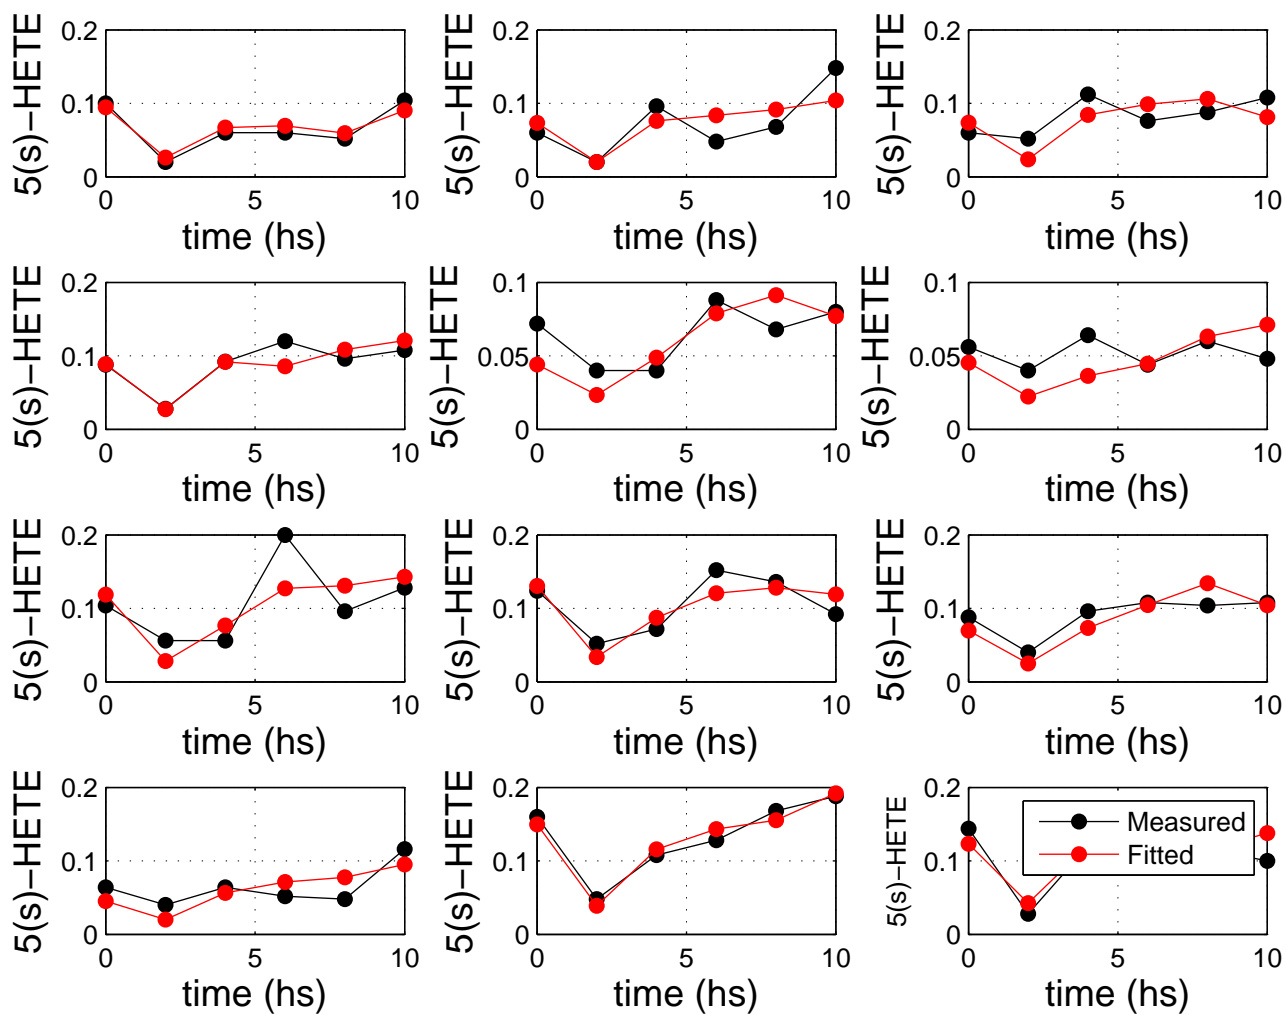

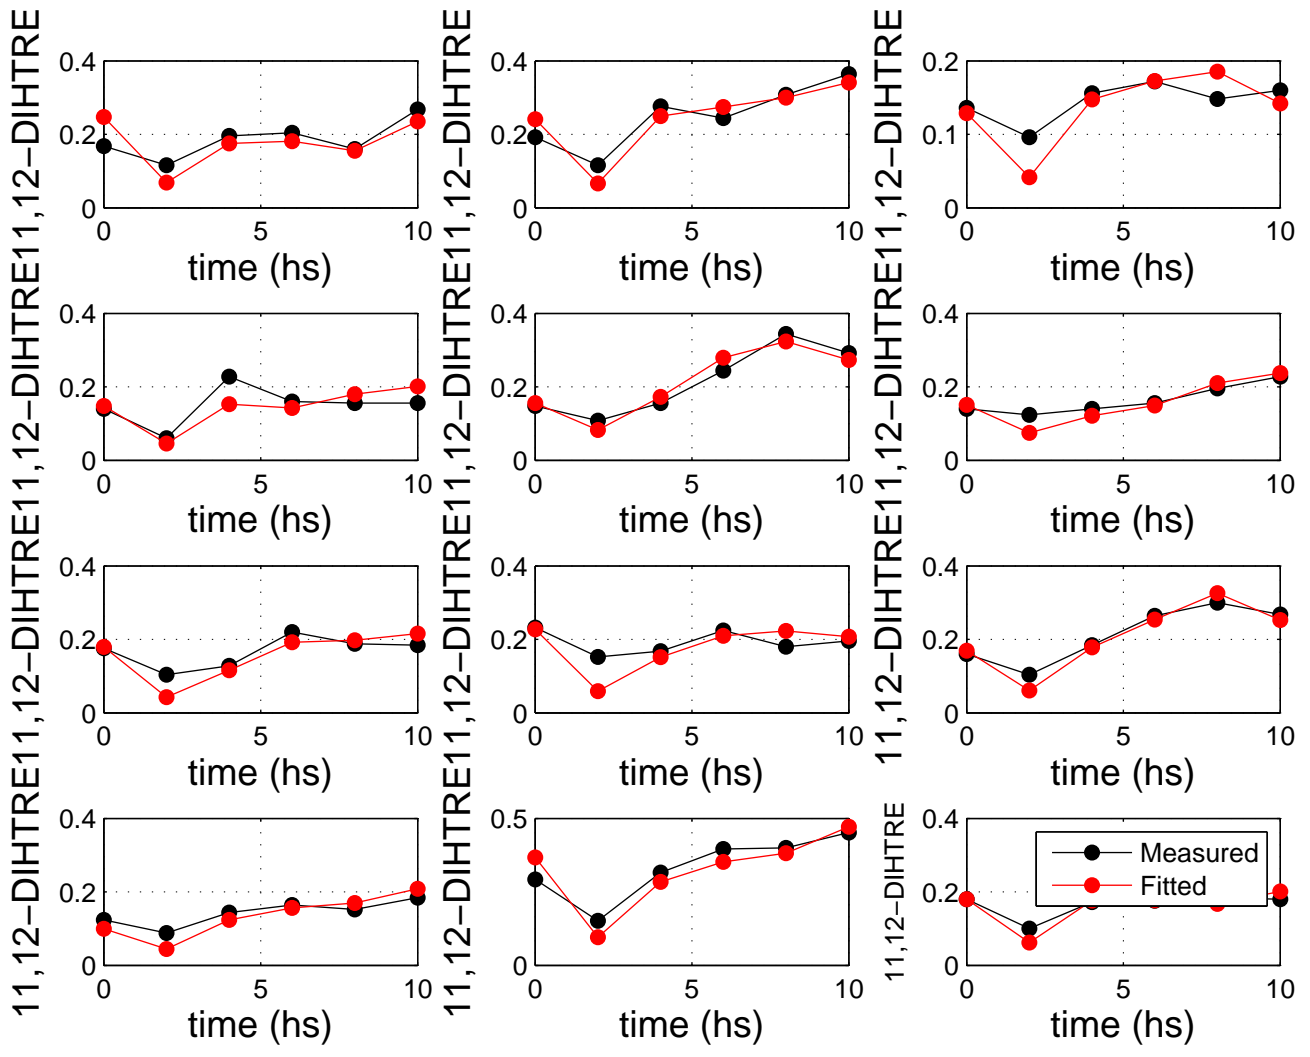

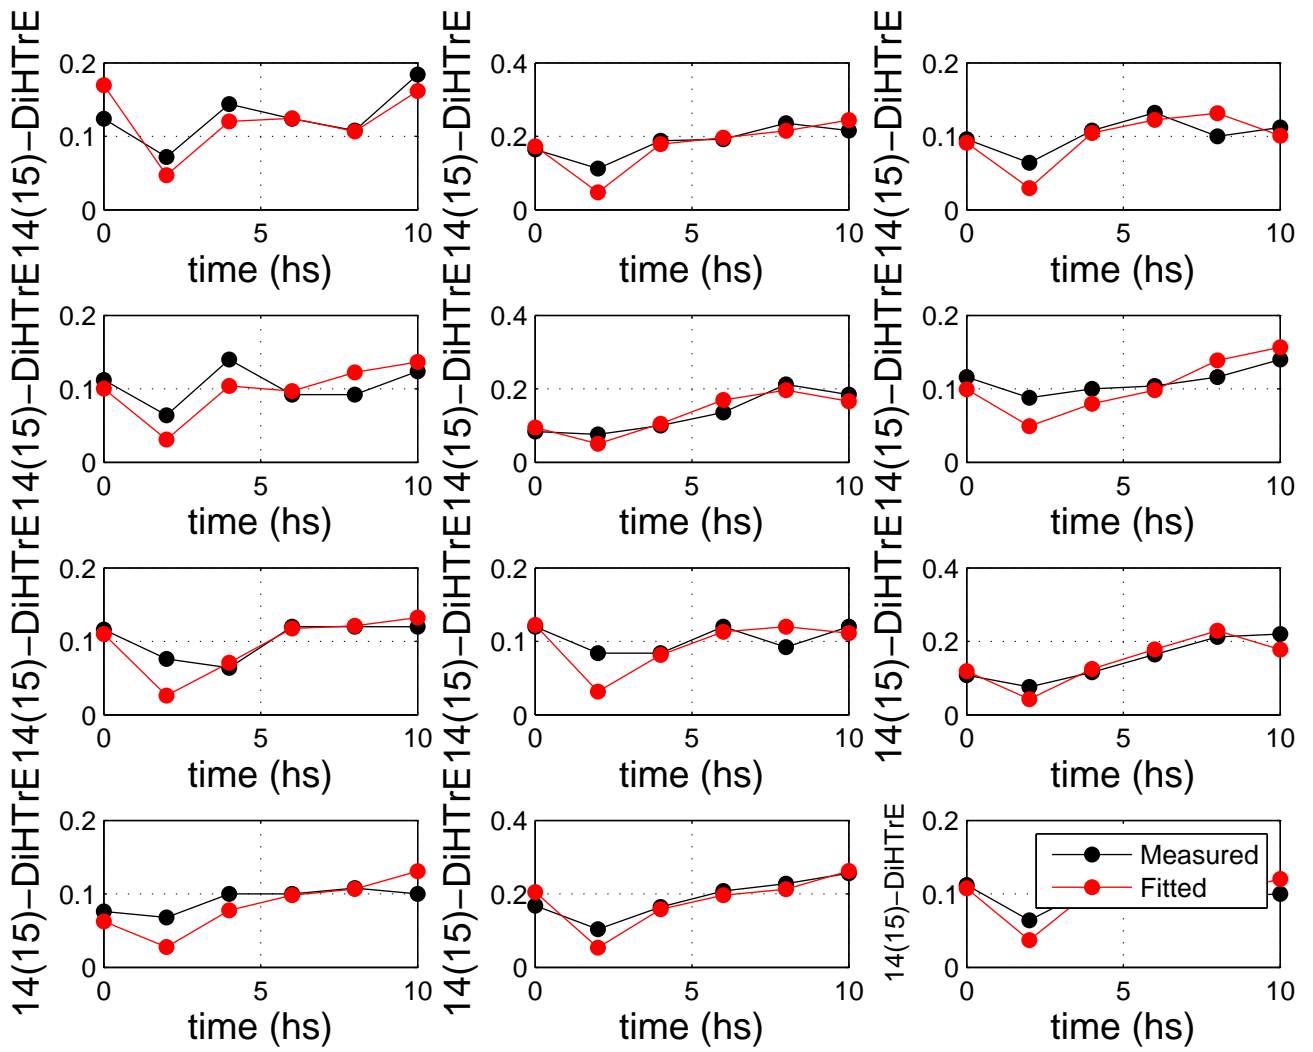

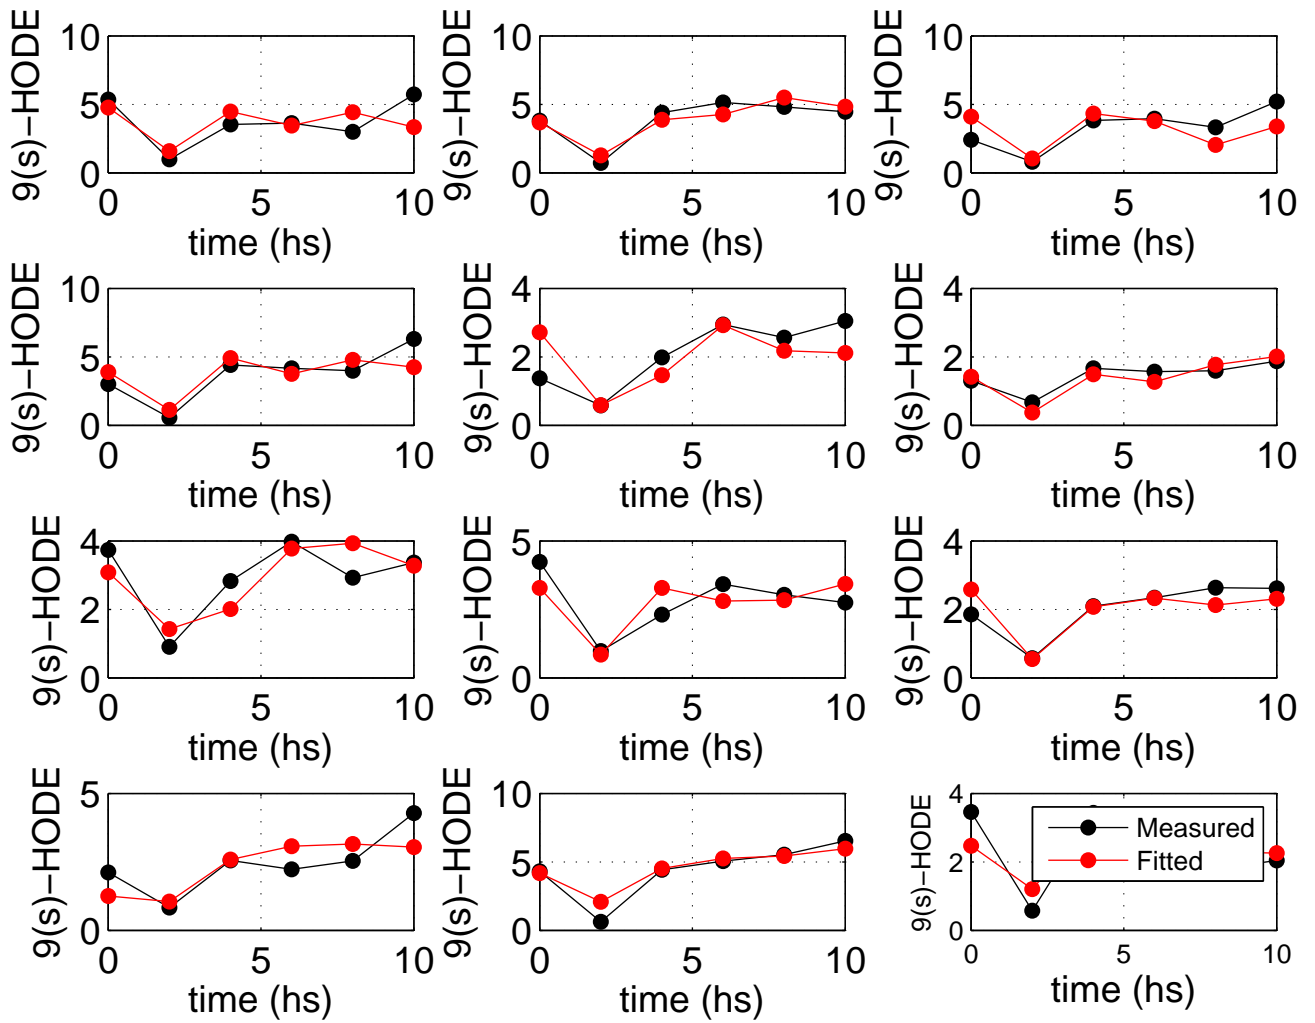

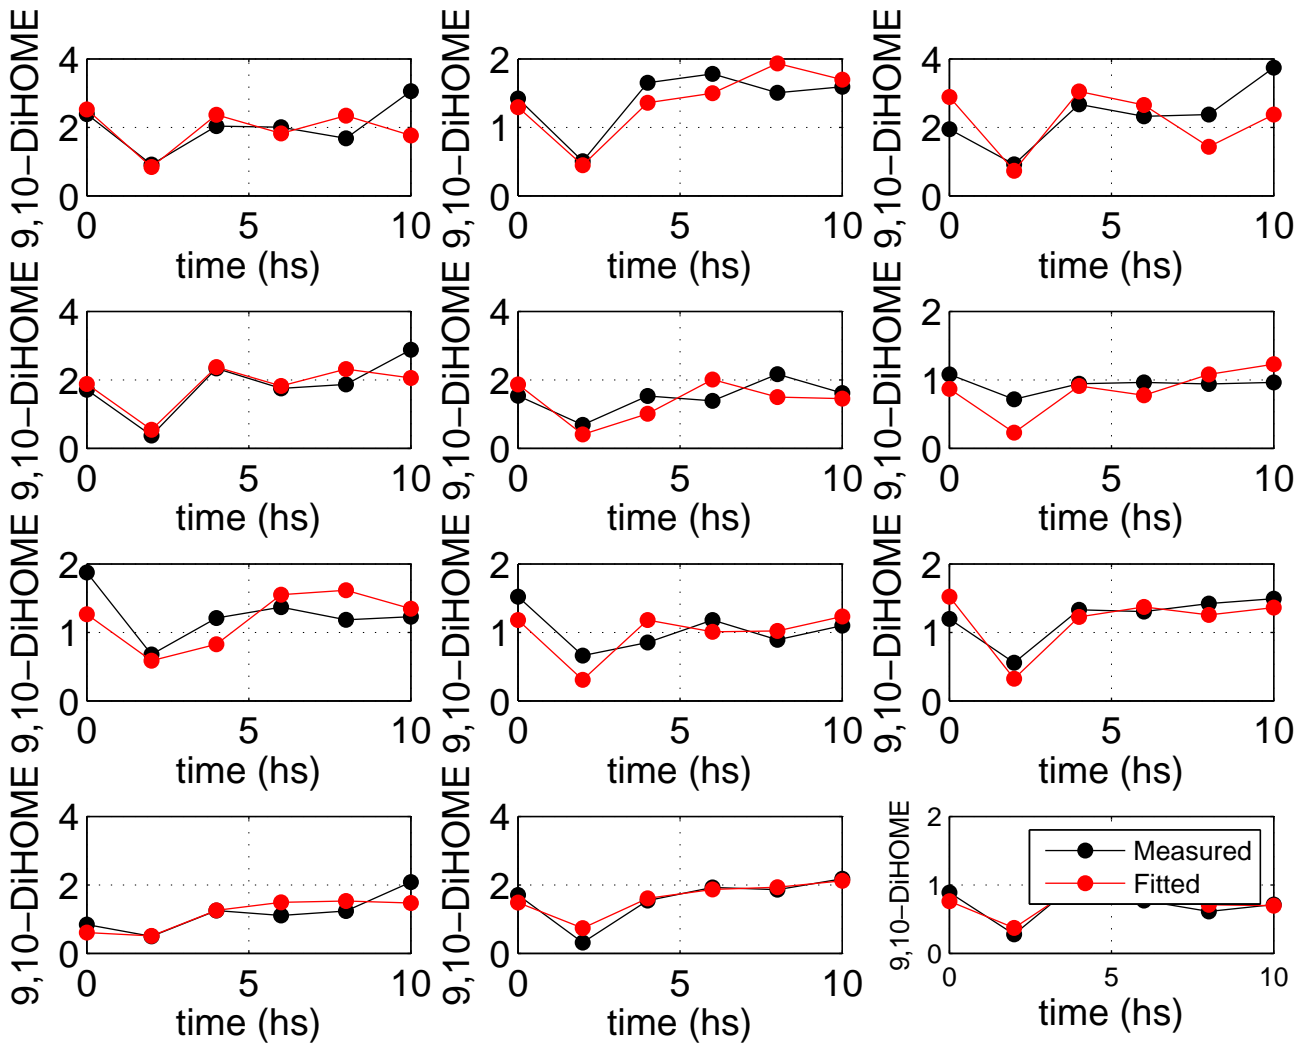

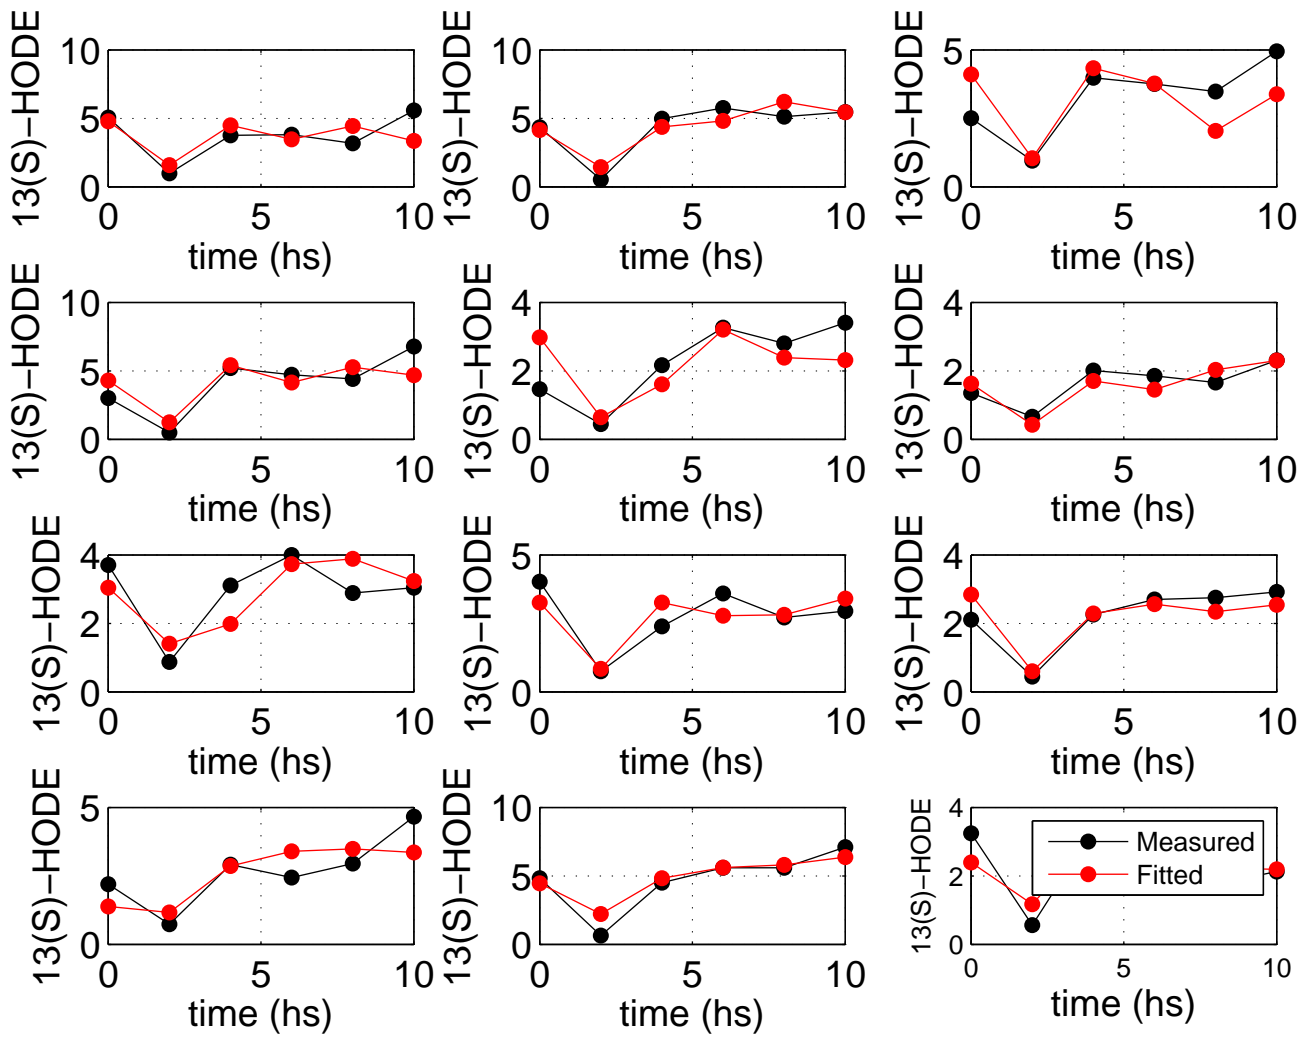

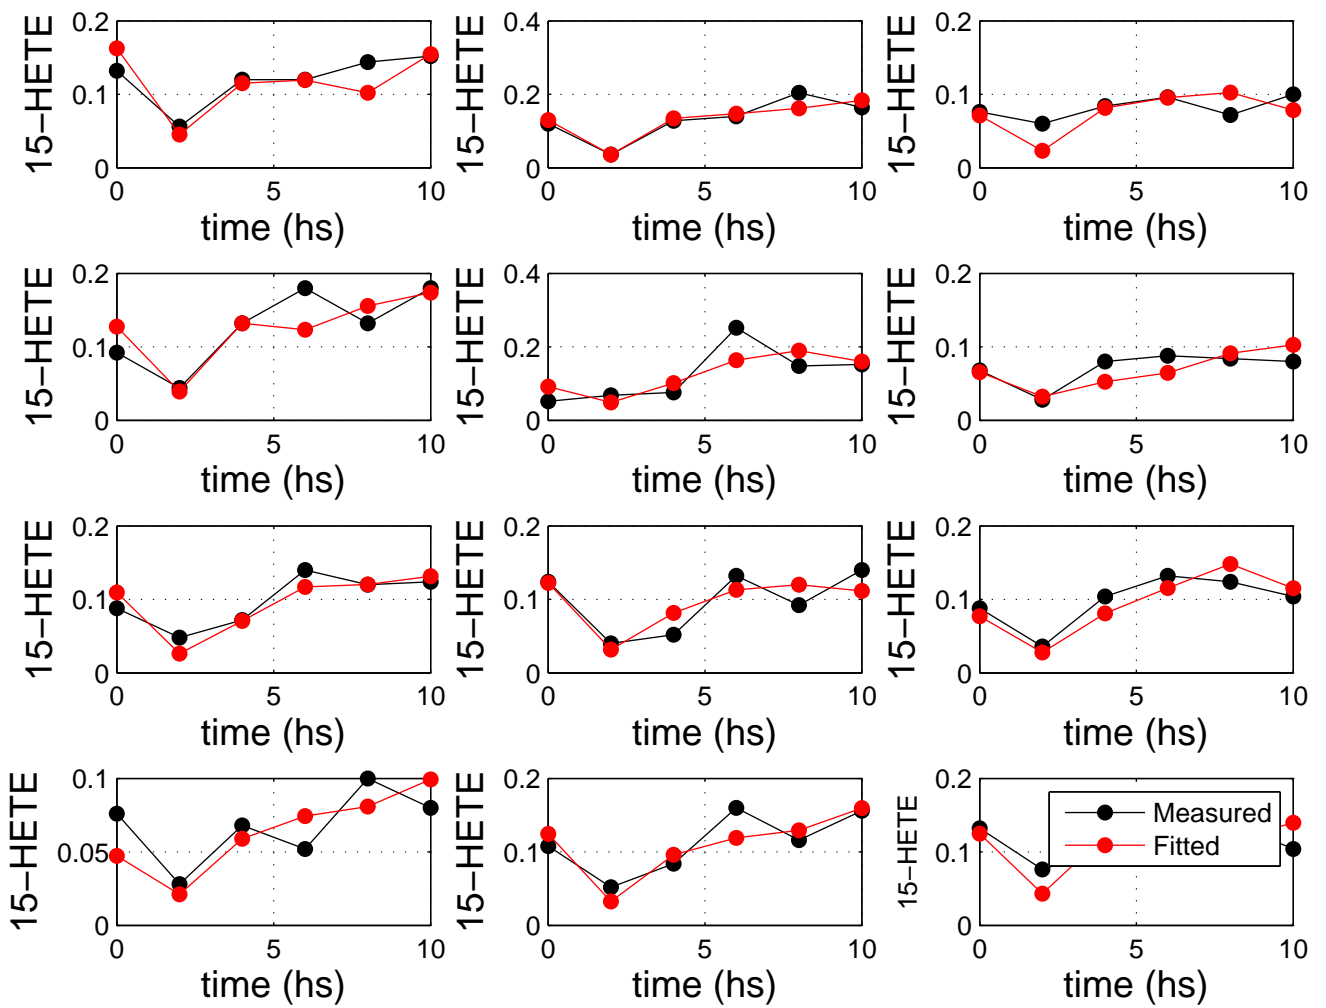

Supplement: pone.0119856.s001.pdf [file pone.0119856.s001.pdf]
